# Supplementary material for: Overview and SWOT analysis of nano-ferroptosis therapy for cancers
Source: Royal Society of Chemistry journal article supplement (doi:10.1039/d5nh00170f), 2025-01-01
Supplement: d5nh00170f1.pdf [file d5nh00170f1.pdf]

**Overview and SWOT analysis of nano-ferroptosis therapy for cancers**

Qian Chen<sup>b</sup>, Junli Zhu<sup>b</sup>, Junhuang Jiang<sup>b\*</sup>, Zhengwei Huang<sup>a,b\*</sup>

(a State Key Laboratory of Bioactive Molecules and Druggability Assessment,  
Department of Pharmacy, Jinan University, Guangzhou 511436, P. R. China  
b Department of Pharmacy, College of Pharmacy, Jinan University, Guangzhou  
511436, P. R. China)

\*Corresponding authors.

Zhengwei Huang, Ph.D., Tel & Fax: 020-39943117, E-mail address:

[huangzhengw@jnu.edu.cn](mailto:huangzhengw@jnu.edu.cn)

E-mail addresses of the authors are listed below.

Qian Chen (Q. Chen, Q. C.): [chenqian@stu2024.jnu.edu.cn](mailto:chenqian@stu2024.jnu.edu.cn)

Junli Zhu (J. Zhu, J. Z.): [zhujunli@stu2024.jnu.edu.cn](mailto:zhujunli@stu2024.jnu.edu.cn)

Junhuang Jiang (J. Jiang, J. J.): [junhuangjiang@163.com](mailto:junhuangjiang@163.com)

Zhengwei Huang (Z. Huang, Z. H.): [huangzhengw@jnu.edu.cn](mailto:huangzhengw@jnu.edu.cn)

## 20 **Recent progress in various cancers treatment**

21       Currently, nano-ferroptosis therapy has demonstrated promising efficacy in the  
22 treating various cancers, including glioma, lung cancer, breast cancer, pancreatic  
23 cancer, colorectal cancer (CRC), melanoma, prostate cancer, and ovarian cancer. In the  
24 following sections, we will review studies detailing the use of nano-ferroptosis therapy  
25 in each of these cancer types.

### 26 **Glioma therapy**

27       Glioma is a highly aggressive and lethal primary brain tumor that accounts for 40-  
28 60% of all primary intracranial tumors, making it the most common type of tumor in  
29 the central nervous system <sup>1</sup>. Glioblastoma (GBM), a subtype of glioma, is  
30 characterized by high morbidity, recurrence, and mortality, with a 5-year survival rate  
31 of approximately 5% <sup>2</sup>. Emerging ferroptosis therapy have shown potential not only in  
32 shaping the acidic, hypoxic, and immunosuppressive glioma microenvironment but  
33 also in inhibiting glioma cell proliferation and aggressive growth <sup>3</sup>. For instance,  
34 ferroptosis inducer RSL3 has been found to induce glycolytic dysfunction and  
35 autophagy-dependent ferroptosis in glioma cells, thereby inhibiting glioma cell growth  
36 <sup>4</sup>. In addition, ferroptosis inducers that inhibit GPX4 expression can synergize with  
37 radiotherapy to kill glioma cells without exacerbating DNA damage <sup>5</sup>. These findings  
38 underscore ferroptosis as a promising therapeutic strategy for glioma treatment.

39       Researchers have recently reported an effective treatment for glioma using  
40 nanocomposites to induce ferroptosis. Liu *et al.* developed a new bionic brain-targeted  
41 nano-delivery system ( $\text{Fe}_3\text{O}_4$ -siPD-L1@M-BV2 type) for combined ferroptosis-  
42 immunization therapy of drug-resistant GBM.  $\text{Fe}_3\text{O}_4$  nanoparticles alone were difficult  
43 to cross the blood-brain barrier (BBB), but the nanosystems coated with microglial cell  
44 membranes (M-BV2 type) mimic the natural penetration mechanism of microglia, and  
45 were successfully recruited into drug-resistant GBMs through the BBB. When uptake  
46 by GBM cells, the loaded siPD-L1 was released to inhibit the protein expression of  
47 programmed cell death ligand-1 (PD-L1) in GBM cells. This inhibition activated  
48 Effector T cells (Teff cells), which secreted interferon- $\gamma$  (IFN- $\gamma$ ) to promote ferroptosis  
49 of GBM cells, and the process also promoted the maturation of DC cells (Figure S2) <sup>6</sup>.

50 In another study, Zhu *et al.* prepared surface-modified polymer nanomedicine  
51 (HPNFCN) with neutrophil-targeting ligands. Due to the natural BBB crossing and  
52 tumor-infiltrating ability of neutrophils, HPNFCN could be delivered to the *in situ*  
53 glioma site via neutrophil-mediated hitchhiking across the BBB. The results suggested  
54 that HPNFCN achieved a synergistic ferroptosis immunotherapy cascade, with a potent  
55 inhibitory effect on the growth of *in situ* gliomas <sup>7</sup>. Similarly, Li *et al.* designed a  
56 ferroptosis therapeutic platform by coupling angiopep-2 peptide-modified engineered  
57 exosomes with magnetic nanoparticles (MNPs). Angiopep-2 triggered transcytosis,  
58 allowing particles to cross the BBB and target GBM cells by recognizing low-density  
59 lipoprotein receptor protein 1 (LRP-1) <sup>8</sup>.

## 60 **Lung cancer therapy**

61 Lung cancer is one of the most prevalent cancers worldwide. Despite the many  
62 therapeutic options, the 5-year survival rate for lung cancer remains low, with drug  
63 resistance posing a significant challenge in treatment <sup>9</sup>. Literature suggests that the  
64 progression of lung cancer can be suppressed through the induction of ferroptosis in  
65 lung cancer cells, concurrently bypassing the issue of drug resistance in these cells <sup>10</sup>.  
66 Further studies revealed that curcumin, a biologically active natural compound, could  
67 induce the onset of ferroptosis by inhibiting the expression of GPX4 and FSP1 in lung  
68 cancer cells, thereby inhibiting the growth of lung cancer cells <sup>11</sup>. In addition, Feng *et*  
69 *al.* demonstrated that the combination of isoorientin (IO) and DDP induced ferroptosis  
70 and reversed drug resistance in lung cancer cells by modulating the SIRT6/Nrf2/GPX4  
71 signaling pathway <sup>12</sup>. These findings illustrate the great potential of ferroptosis as a  
72 therapeutic strategy in lung cancer treatment.

73 Further evidence has demonstrated the effectiveness of ferroptosis for treating  
74 lung cancer. Tian *et al.* developed a nanomedicine for non-small cell lung cancer  
75 (NSCLC) treatment of by self-assembly of tetravalent platinum (Pt) encapsulated in  
76 human serum albumin (HSA@Pt(IV)). They investigated the *in vivo* distribution of  
77 cisplatin and HSA@Pt(IV) using the Lewis Lung Carcinoma (LLC) subcutaneous  
78 homograft mouse model. Fluorescence analysis showed that HSA@Pt(IV) had a  
79 stronger ability to accumulate at the tumor site compared to cisplatin, suggesting its

80 drug delivery capacity. The experimental results indicated that HSA@Pt (IV) could  
81 significantly deplete GSH in tumor cells, triggering ferroptosis (Figure S3) <sup>13</sup>.  
82 Similarly, Fu *et al.* developed an inhalable biomineralized liposome LDM co-loaded  
83 with DHA and calcium phosphate, administered via nebulization to achieve effective  
84 accumulation in the lungs and further enhanced ferroptosis therapy by an endoplasmic  
85 reticulum (ER) process centered on Ca<sup>2+</sup> burst. The results demonstrated the sustained  
86 lung accumulation and remarkable anti-tumor capacity of LDM <sup>14</sup>.

## 87 **Breast cancer**

88 Breast cancer remains the most common cancer globally, especially among  
89 females, accounting for about 30% of all cancers in women and posing a significant  
90 threat to human health. It is influenced by several factors, including economic  
91 development, family genetics, hormone therapy, and lifestyle <sup>15</sup>. While radiotherapy is  
92 commonly employed for local treatment, it is often associated with non-specific toxicity  
93 and drug resistance. Studies have shown that drug-resistant breast cancer cells are  
94 dependent on GPX4, suggesting that they may be sensitive to ferroptosis induced by  
95 downregulation of GPX4 expression. This indicates that ferroptosis could serve as a  
96 potential target to overcome drug resistance in breast cancer <sup>16</sup>. Ferroptosis inducers  
97 such as RSL3 <sup>17</sup> and SAS <sup>18</sup> have been shown to inhibit the peroxidase activity of GPX4  
98 in breast cancer cells, thereby triggering ferroptosis. Hence, ferroptosis therapy holds  
99 promise as an alternative to traditional radiotherapy for the treatment of breast cancer,  
100 potentially offering a novel approach.

101 In this context, Liang *et al.* constructed novel tumor microenvironment-activated  
102 metal-organic frameworks (AuFCSP MOFs) to enhance anticancer therapy through a  
103 combination of radiotherapy and ferroptosis induction. These nanoparticles were  
104 enriched at the tumor site through the EPR effect and reduced by GSH within the tumor,  
105 releasing Au NPs and Fe/Cu ions, ultimately triggering ferroptosis <sup>19</sup>. Similarly, Wu *et al.*  
106 engineered a binary lipid nanoregulator (RO NA) using nano-assembly technology  
107 and molecular engineering. RO NA consists of a GPX4 inhibitor and lipid metabolism  
108 regulators designed to disrupt the ultimate lipid membrane defense against ferroptosis  
109 in cancer cells. Orlistat in nanosystem (sp-RO NAs) acted as a “dual enhancer”. On the

one hand, it acted as an inhibitor of the enzyme FASN to regulate lipid composition. On the other hand, non-cytotoxic orlistat in combination with RSL3 significantly enhanced the cytotoxicity of RSL3 on tumor cells as well as RSL3-induced GPX4 depletion, thereby promoting the ferroptosis of breast cancer cells, as shown in Figure S4. *In vivo* results demonstrated the anti-tumor efficacy of RO NA in 4T1-loaded mice<sup>20</sup>.

#### **Pancreatic cancer therapy**

Despite ongoing advancements in oncology, the treatment of pancreatic cancer remains a major challenge to human health, generally recognized as “the king of cancers”. The five-year survival rate for pancreatic cancer is still under 10%, largely due to the unique biology of pancreatic tumors, which hampers the treatment effects<sup>21</sup>. Studies have shown that linoleic acid (LA) and  $\alpha$ -linolenic acid ( $\alpha$ LA) in 18-carbon fatty acids increased lipid peroxidation in pancreatic cancer cells, exhibiting morphological changes in ferroptosis and inhibiting cancer cell growth<sup>22</sup>. In addition, Eling *et al.* found that ART specifically induced ferroptosis in pancreatic ductal adenocarcinoma (PDAC) cell lines and achieved the highest cytotoxicity in PDAC cell lines. After treatment with ferrostatin-1, a ferroptosis inhibitor, lipid peroxidation, and cell death were inhibited and cell survival increased in PDAC<sup>23</sup>. Overall, these findings indicate that ferroptosis activation offers a promising and novel approach for treating pancreatic cancer.

In a recent study, Huang *et al.* developed a novel iron-containing nanoparticle formulation loaded with the ferroptosis inducer erastin, termed PTFE. This nanoparticle system operates via a dual anti-tumor mechanism, providing an efficient treatment for pancreatic cancer. The nanoparticle consists of two parts: a nanocore made from erastin encapsulated within a PLGA and a MOF shell formed by liganding  $\text{Fe}^{3+}$  with tannic acid (TA). When entering the pancreatic cancer cells, the PTFE nanoparticles release both erastin and  $\text{Fe}^{3+}$ , which synergistically disrupted the redox balance at the tumor site, leading to ferroptosis of the cancer cells (Figure S5). Both *in vivo* and *in vitro* experiments demonstrated the efficacy of PTFE in treating pancreatic cancer, with good tolerability and biocompatibility *in vivo*, highlighting its potential as a therapeutic agent

140 <sup>24</sup>. In addition, Yu *et al.* developed a dual-gated nanodrug based on MXene that  
141 specifically targeted pancreatic cancer cells and induced ferroptosis, demonstrating  
142 potent anti-cancer effects <sup>25</sup>.

### 143 **CRC therapy**

144 CRC is the most common and highly aggressive malignant tumor of the  
145 gastrointestinal system. The mainstay of clinical treatment includes chemotherapy,  
146 surgery, and radiotherapy. However, clinical resistance and the inflammatory tumor  
147 microenvironment (TME) lead to poor responses to current therapies, resulting in  
148 unsatisfactory treatment outcomes for patients <sup>26</sup>. Encouragingly, it has been reported  
149 that the level of ROS, a key component of ferroptosis, is typically higher in CRC cells  
150 than in normal cells, suggesting that CRC cells are particularly susceptible to ferroptosis  
151 <sup>27</sup>. Another study revealed that downregulation of the m<sup>6</sup>A demethylase fat mass and  
152 obesity-associated protein (FTO) expression in CRC cells inhibited the effects of  
153 SLC7A11 or GPX4, enhancing the sensitivity of CRC cells to erastin and RSL3  
154 treatment, thereby triggering ferroptosis and ultimately inhibiting CRC cell  
155 proliferation <sup>28</sup>. The above results further support the potential and feasibility of  
156 ferroptosis as a therapeutic approach to treat CRC.

157 In response, Deng *et al.* developed a multifunctional chemical-photothermal  
158 nanoplatform LCC NPs, consisting of camptothecin (CPT) and IR820. The Se-Se bond  
159 in the LCC NPs, upon rupture, triggered oxidative stress and depletion of GSH in cancer  
160 cells to counteract this effect, leading to excessive accumulation of LPO.  
161 Simultaneously, exogenous LA was oxidized under photothermal conditions, resulting  
162 in a significant increase in ROS, further promoting LPO accumulation and inducing  
163 ferroptosis in CRC cells (Figure S6) <sup>29</sup>. Recent studies have targeted hydrogen sulfide  
164 (H<sub>2</sub>S), a known promoter of colorectal tumor growth. Pan *et al.* designed H<sub>2</sub>S-  
165 responsive zinc oxide-coated virus-like silica nanoparticles (VZnO), in which zinc  
166 oxide (ZnO) was an efficient desulphurizing agent. When reaching the tumor site,  
167 VZnO reacted with H<sub>2</sub>S in the tumor cells, significantly reducing the GSH level in the  
168 tumor cells and leading to a substantial accumulation of LPO in the tumor cells, which  
169 ultimately induced ferroptosis <sup>30</sup>.

## 170 **Other cancers therapy**

171 In addition to the cancers mentioned above, other cancers such as melanoma <sup>31</sup>,  
172 prostate cancer <sup>32</sup>, and ovarian cancer <sup>33</sup> have also been widely treated with nano-  
173 ferroptosis therapy. For example, Wang *et al.* designed an EFP nanocapsule by self-  
174 assembling epigallocatechin gallate (EGCG) and ROS-producer phenethyl  
175 isothiocyanate (PEITC). This nanocapsule was then integrated into a microneedle  
176 patch, forming EFP@MNs, which showed enhanced therapeutic efficacy in melanoma  
177 treatment. The results indicated that EFP@MNs promoted the accumulation of LPO,  
178 thereby inducing ferroptosis in melanoma cells <sup>34</sup>. For prostate cancer, Wang *et al.*  
179 designed metal-free arsenic nanosheets PMANs loaded with DOX, targeting the  
180 prostate-specific membrane antigen (PSMA) for efficient treatment of prostate cancer.  
181 PMANs inhibited the expression of SLC7A11 and GPX4, leading to enhanced ROS  
182 production and LPO accumulation, which triggered ferroptosis. Moreover, PMANs  
183 increased the sensitivity of prostate cancer cells to DOX, thereby amplifying the tumor-  
184 killing effect of the synergistic treatment <sup>35</sup>. Similarly, Wang *et al.* developed Pt(IV)-  
185 loaded human serum albumin (HSA) nanoparticles, named Abplatin <sup>(iv)</sup>, for the  
186 treatment of ovarian cancer. Abplatin <sup>(iv)</sup> demonstrated low systemic toxicity, induced  
187 ferroptosis in ovarian cancer cells, and significantly inhibited the growth of platinum-  
188 resistant ovarian cancer cells <sup>36</sup>. In conclusion, these studies underscore the promising  
189 future of nano-ferroptosis therapy across a wide range of cancers. As a potential  
190 alternative to conventional therapies, this innovative approach holds great promise for  
191 enhancing the efficacy and reducing the toxicity of cancer treatment.

192

193

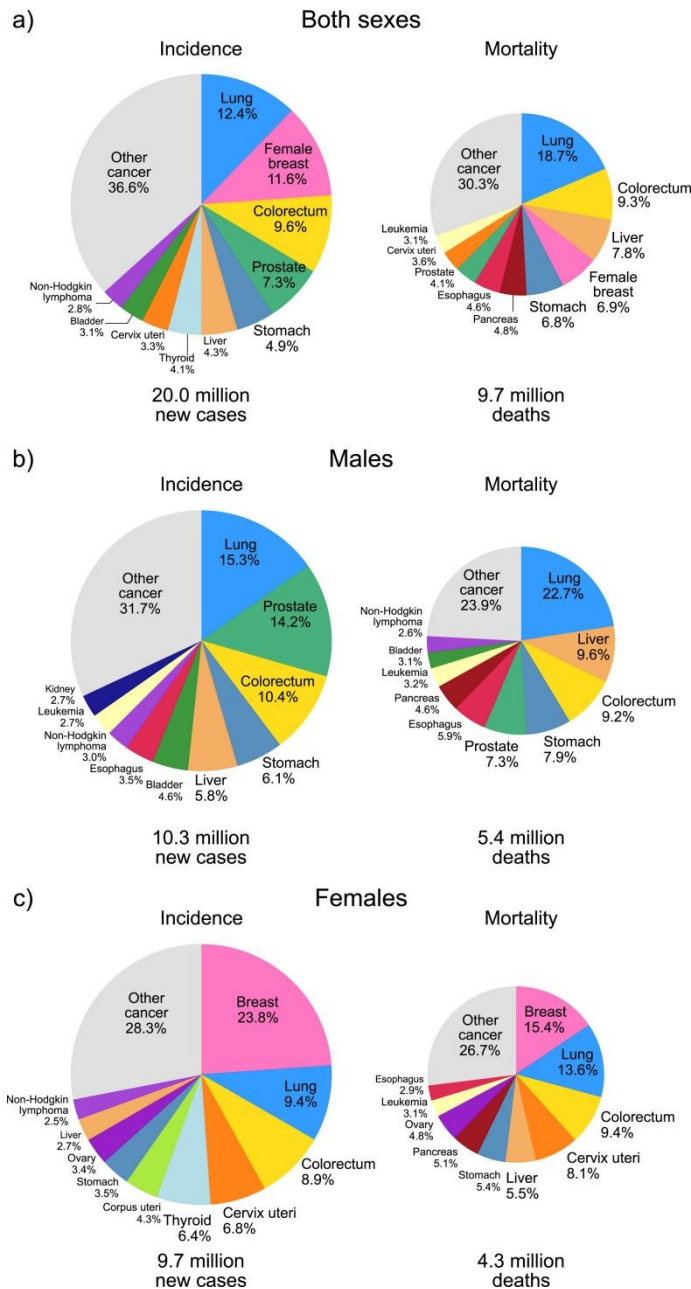

Figure S1. Incidence and mortality rates of various cancers in (a) both sexes, (b) men and (c) women, Reproduced from Bray et al. with permission from the CA: A Cancer Journal for Clinicians <sup>37</sup>.

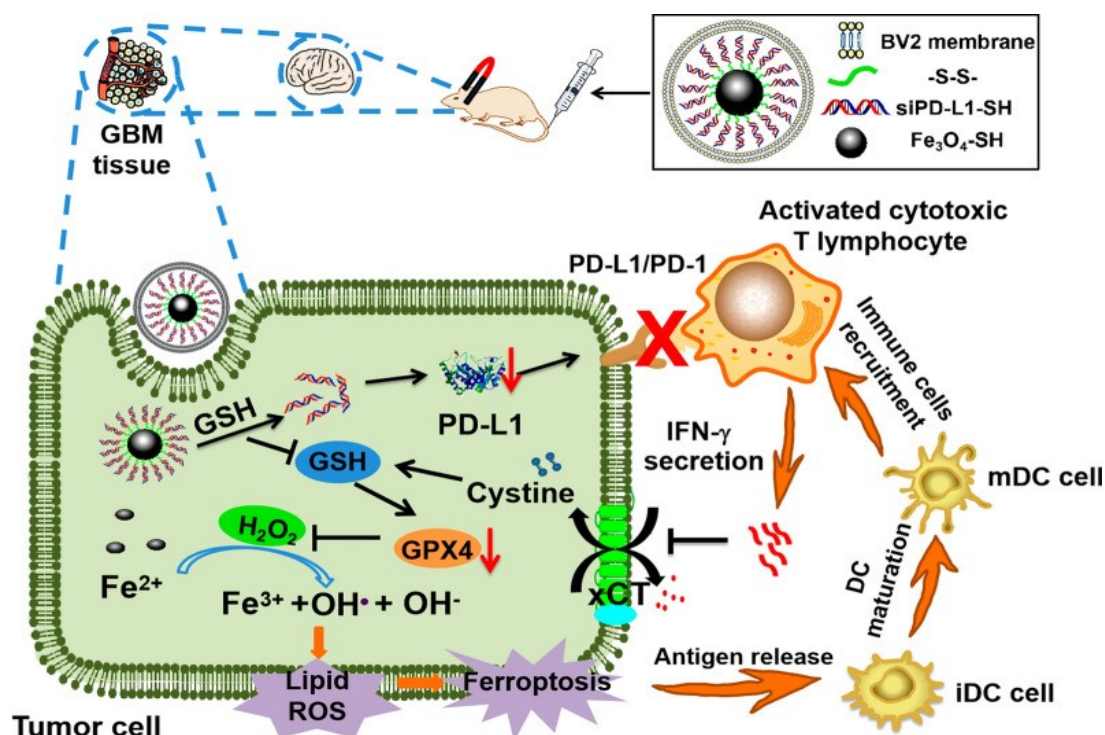

199

200 **Figure S2.** Reciprocal cascade amplification between ferroptosis and immunotherapy  
 201 of Fe<sub>3</sub>O<sub>4</sub>-siPD-L1@M-BV2 for GBM treatment. Reproduced from Liu *et al.* with  
 202 permission from the Journal of Nanobiotechnology <sup>6</sup>. Abbreviations: GBM:  
 203 glioblastoma, IFN-γ: interferon-γ, PD-L1: programmed cell death ligand-1, GSH:  
 204 glutathione, GPX4: glutathione peroxidase 4, H<sub>2</sub>O<sub>2</sub>: hydrogen peroxide, ROS: reactive  
 205 oxygen species, DC: dendritic cell.

206

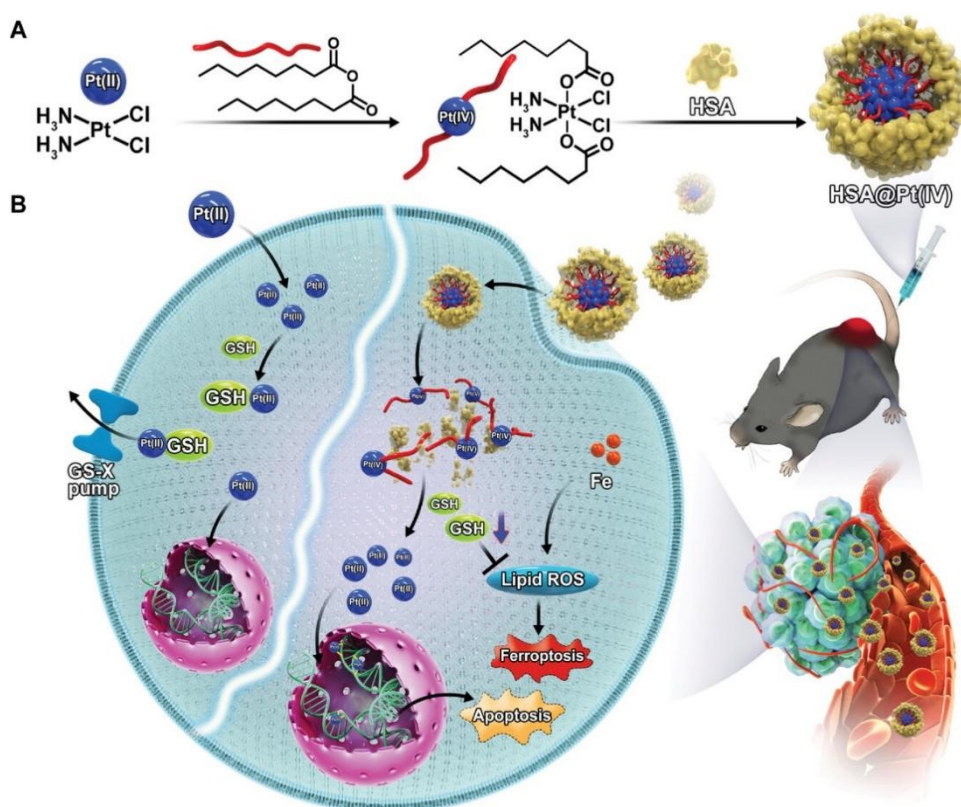

207

208 **Figure S3.** (A) Construction of HSA@Pt(IV) and (B) schematic illustration of NSCLC  
 209 cell death induced by HSA@Pt(IV). Reproduced from Tian *et al.* with permission from  
 210 the Small <sup>13</sup>. Abbreviations: Pt: platinum, HAS: human serum albumin, GSH:  
 211 glutathione, ROS: reactive oxygen species.

212

213

214

215

216

217

218

219

220

221

222

223

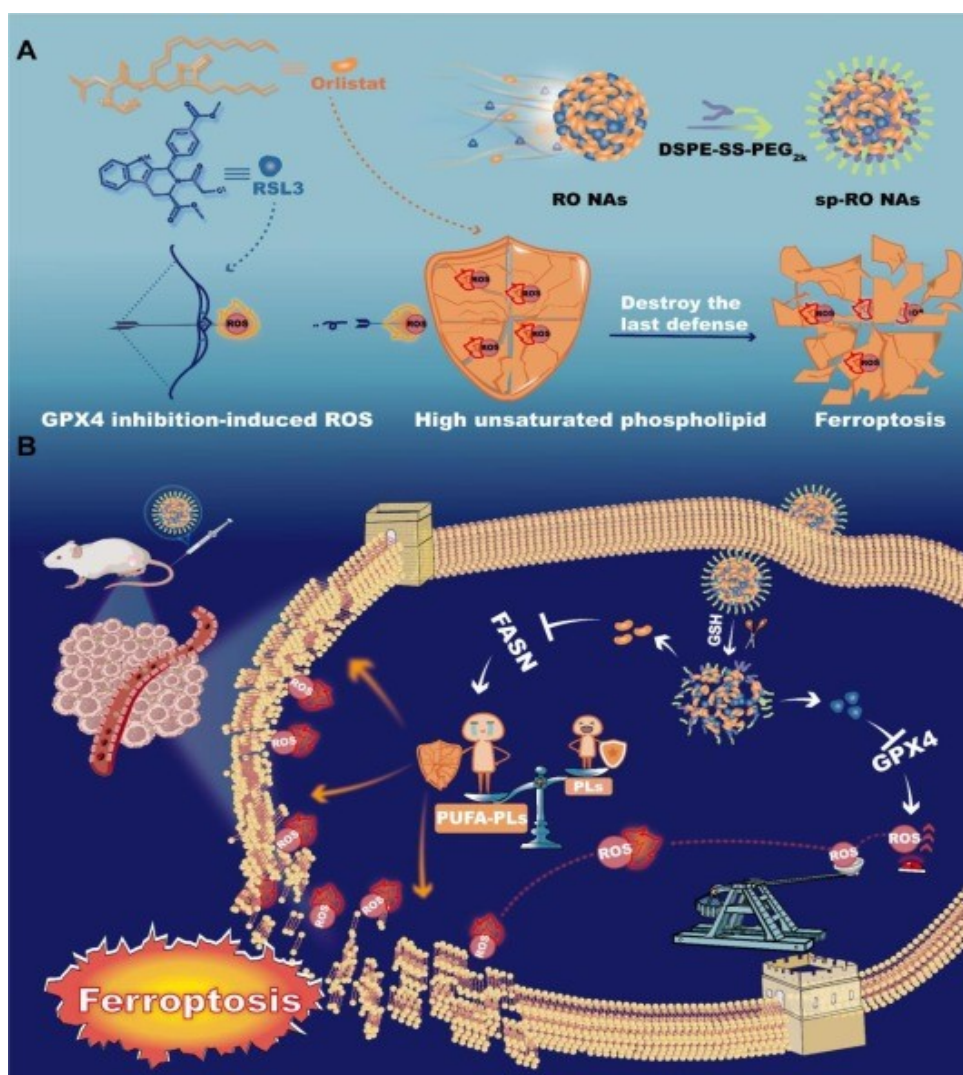

224

225 **Figure S4.** Schematic presentation of a self-engineered lipid nanoregulator for  
 226 ferroptosis-driven breast cancer treatment. Reproduced from Wu *et al.* with permission  
 227 from the Chemical Engineering Journal <sup>20</sup>. Abbreviations: DSPE:  
 228 distearoylphosphatidylethanolamine, PEG: polyethylene glycol, GSH: glutathione,  
 229 GPX4: glutathione peroxidase 4, PUFA: polyunsaturated fatty acid, ROS: reactive  
 230 oxygen species, FASN: fatty acid synthase.

231

232

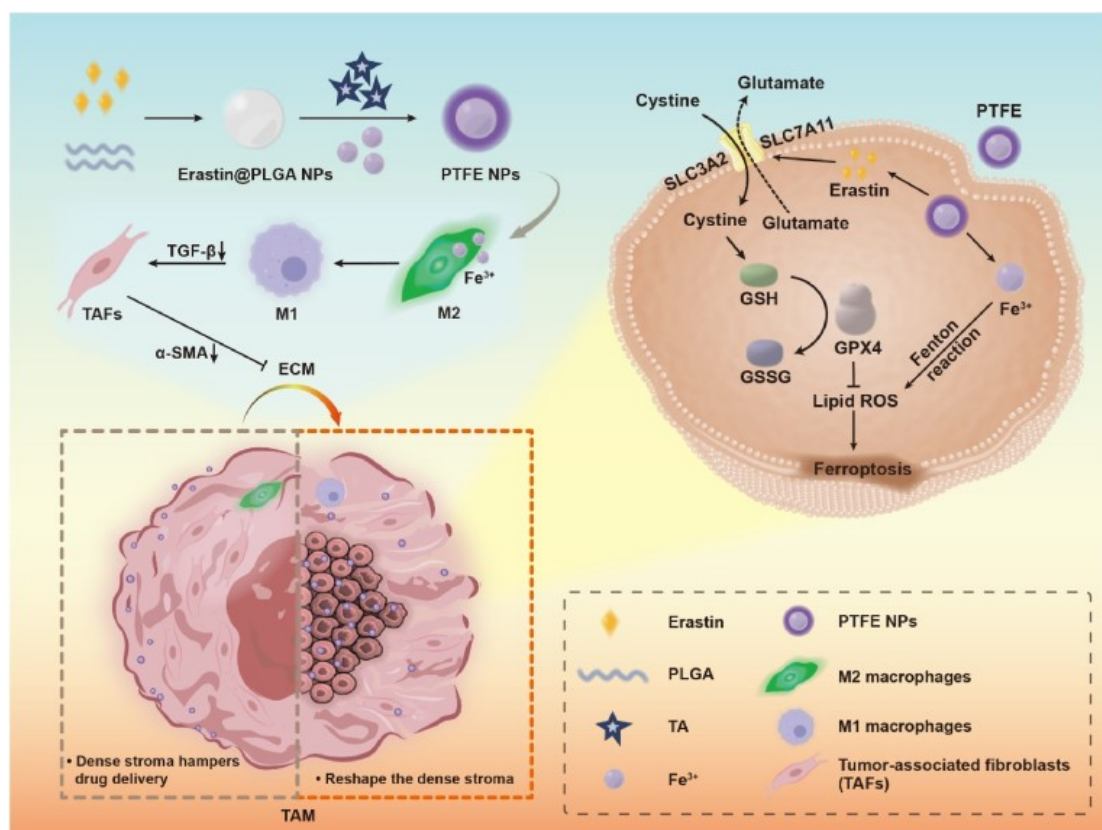

233  
 234 **Figure S5.** Schematic illustration of the preparation and mechanism of action for the  
 235 PTFE for pancreatic cancer treatment. Reproduced from Huang *et al.* with permission  
 236 from the Materials Today Bio <sup>24</sup>. Abbreviations: PLGA: poly(lactic-co-glycolic acid),  
 237 TAM: tumor-associated macrophages, TAFs: tumor-associated fibroblasts, TGF- $\beta$ :  
 238 transforming growth factor-beta, ECM: extracellular matrix, GSH: glutathione, GPX4:  
 239 glutathione peroxidase 4, GSSG: oxidized GSH, ROS: reactive oxygen species, TA:  
 240 tannic acid.

241  
 242

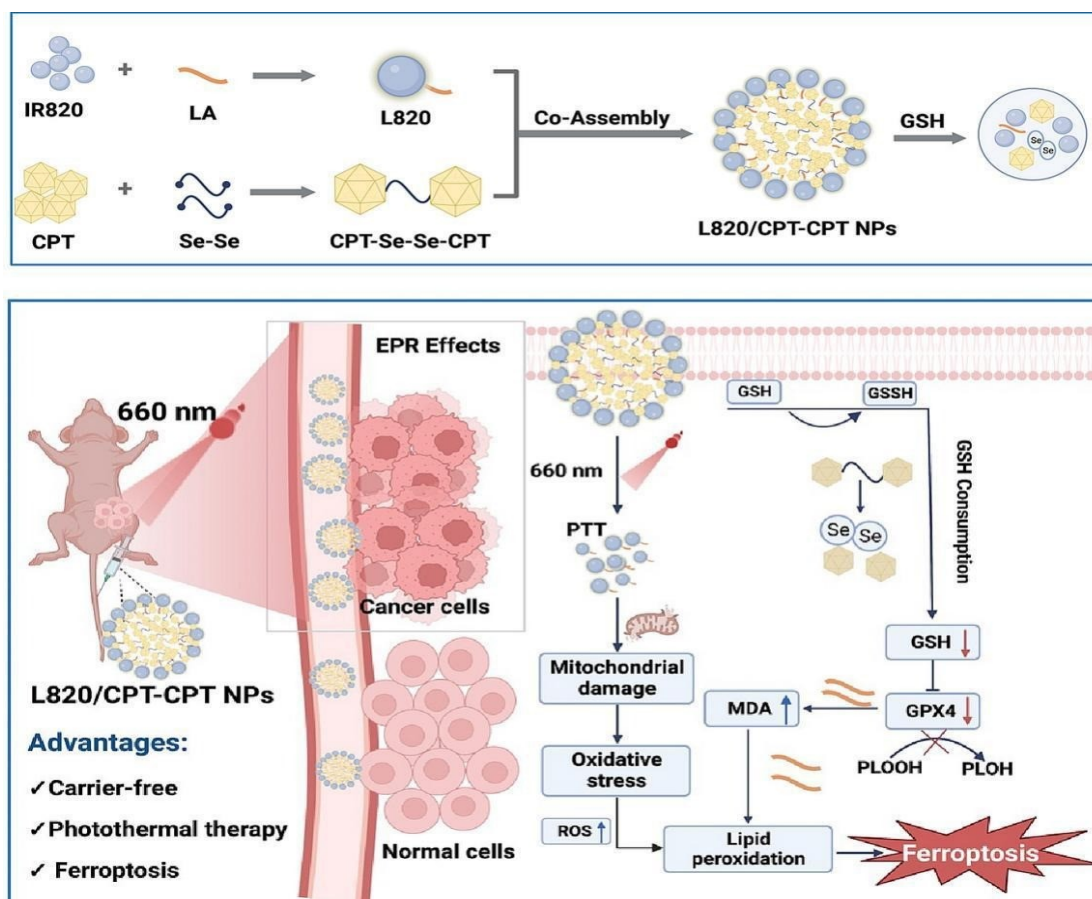

243

244 **Figure S6.** Schematic illustration of GSH-triggered NPs for anti-CRC treatment.

245 Reproduced from Deng *et al.* with permission from the Journal of Controlled Release

246 <sup>29</sup>. Abbreviations: CPT: camptothecin, LA: linoleic acid, MDA: malondialdehyde,

247 PTT: photothermal therapy, EPR: enhanced permeability and retention, GSH:

248 glutathione, GPX4: glutathione peroxidase 4, GSSH: glutathione disulfide, ROS:

249 reactive oxygen species.

**Table S1.** Abbreviations and their full forms in the review.

| Abbreviations | Full Forms                                              |
|---------------|---------------------------------------------------------|
| Aa            | auriculocide acetate                                    |
| ACSL4         | Acyl-CoA synthetase long-chain family member 4          |
| ADME          | adsorption, distribution, metabolism, and excretion     |
| AI            | Artificial intelligence                                 |
| AI-CSR        | AI-based Complex Systems Response                       |
| AKI           | acute kidney injury                                     |
| AML           | acute myeloid leukemia                                  |
| AMPK          | human phosphorylated adenylate-activated protein kinase |
| ANG           | angiopep-2                                              |
| APE1          | apurinic/apyrimidinic endonuclease 1                    |
| ASO-MALAT1    | adenocarcinoma transcript1                              |
| Arg           | arginine                                                |
| ART           | artemunate                                              |
| ATRA          | all-trans retinoic acid                                 |
| BBB           | blood-brain barrier                                     |
| BQR           | brequinar                                               |
| BTC           | bile duct carcinoma                                     |
| CA            | cinnamaldehyde                                          |
| CACN          | co-activated catalytic nano                             |
| CF            | cobalt ferrite                                          |
| CHP           | copper-doped hollow Prussian blue                       |
| CMC           | carboxymethyl chitosan                                  |
| COF           | covalent organic framework                              |
| CoQ           | coenzyme Q                                              |
| CPT           | camptothecin                                            |
| CRC           | colorectal cancer                                       |
| CTL           | cytotoxic T-lymphocyte                                  |

Table S1 (*continued*)

| Abbreviations | Full Forms                                   |
|---------------|----------------------------------------------|
| Cu            | copper                                       |
| Cys           | cysteine                                     |
| DCs           | dendritic cells                              |
| DHA           | dihydroartemisinin                           |
| DHODH         | dihydro nicotinic acid dehydrogenase         |
| DL            | deep learning                                |
| DMT1          | divalent metal transporter protein 1         |
| DNA-FONs      | DNA-functionalized iron oxide nanoparticles  |
| DRF           | disulfidoptosis-related ferroptosis          |
| EPR           | enhanced permeability and retention          |
| ER            | endoplasmic reticulum                        |
| Er            | erastin                                      |
| FAP           | fibroblast activation protein-alpha          |
| FCSP MOFs     | ferroptosis-inducing metal-organic framework |
| FDFT1         | farnesyl-diphosphate farnesyltransferase     |
| FSP1          | ferroptosis inhibitory protein 1             |
| GBM           | Glioblastoma                                 |
| GCL           | glutamate-cysteine ligase                    |
| Glu           | glutamate                                    |
| GOx           | glucose oxidase                              |
| GPX4          | Glutathione peroxidase 4                     |
| GPx-like      | GSH peroxidase-like                          |
| GRAS          | generally recognized as safe                 |
| GSEA          | gene set enrichment analysis                 |
| GSH           | glutathione                                  |
| GSS           | glutathione synthase                         |
| GSSG          | oxidized GSH                                 |

Table S1 (*continued*)

| Abbreviations                 | Full Forms                                  |
|-------------------------------|---------------------------------------------|
| GT                            | green tea extract                           |
| HA                            | hyaluronic acid                             |
| HAP                           | hydroxyapatite                              |
| Hb                            | hemoglobin                                  |
| HCC                           | hepatocellular carcinoma                    |
| HMSN                          | hollow mesoporous silica nanoparticle       |
| 4-HNE                         | 4-hydroxy-2-nonenal                         |
| H <sub>2</sub> O <sub>2</sub> | hydrogen peroxide                           |
| HO-1                          | heme oxygenase 1                            |
| H <sub>2</sub> S              | hydrogen sulfide                            |
| HSA                           | human serum albumin                         |
| IARC                          | International Agency for Research on Cancer |
| IC <sub>50</sub>              | half maximal inhibitory concentration       |
| ICC                           | intrahepatic cholangiocarcinoma             |
| ICD                           | immunogenic cell death                      |
| ICG                           | indocyanine green                           |
| IFN- $\gamma$                 | interferon- $\gamma$                        |
| IO                            | isoorientin                                 |
| IONPs                         | iron oxide nanoparticles                    |
| LA                            | lactic acid                                 |
| LA                            | linoleic acid                               |
| $\alpha$ LA                   | $\alpha$ -linolenic acid                    |
| LAE                           | lauryl arginine ethylester                  |
| LLC                           | Lewis Lung Carcinoma                        |
| L-OH                          | non-toxic fatty alcohols                    |
| LOX                           | lipoxigenase                                |
| LOV                           | lovastatin                                  |

Table S1 (*continued*)

| Abbreviations | Full Forms                             |
|---------------|----------------------------------------|
| LPO           | lipid peroxide                         |
| LRP-1         | lipoprotein receptor-related-1 protein |
| LTB           | lapatinib                              |
| MB            | methylene blue                         |
| MCF           | magnesium-cobalt ferrite               |
| MDR           | multidrug resistance                   |
| ML            | machine learning                       |
| MMP           | mitochondrial membrane potential       |
| Mn            | manganese                              |
| MOA           | mode of action                         |
| MPDA          | mediator pore polydopamine             |
| MPNA          | magnetoplasmonic nanoassembly          |
| MRI           | magnetic resonance imaging             |
| MSNs          | mesoporous silica nanoparticles        |
| MTO           | mitoxantrone                           |
| NC            | nanocluster                            |
| NCOA4         | nuclear receptor coactivator 4         |
| NDA           | new drug application                   |
| NDs           | nanodroplets                           |
| NOX2          | NAPDH oxidase 2                        |
| NPs           | nanoparticles                          |
| NSCLC         | non-small cell carcinoma               |
| OMV           | outer membrane vesicle                 |
| OXA           | oxaliplatin                            |
| PAMAM         | polyamidoamine                         |
| PBPK          | pharmacokinetic                        |
| PCVs          | polyelectrolyte complex nanovesicles   |

Table S1 (*continued*)

| Abbreviations | Full Forms                         |
|---------------|------------------------------------|
| PCa           | prostate cancer                    |
| PDAC          | pancreatic ductal adenocarcinoma   |
| PD-L1         | programmed cell death ligand-1     |
| PDMS          | polydimethylsiloxane               |
| PE            | polyethylene                       |
| PEG           | polyethylene glycol                |
| PEGDA         | poly (ethylene glycol) diacrylate  |
| PET           | polyethylene terephthalate         |
| PFH           | perfluorohexane                    |
| PLC           | Primary liver cancer               |
| PMs           | polymeric micelles                 |
| POD-like      | Peroxidase-like                    |
| PP            | polypropylene                      |
| PSMA          | prostate-specific membrane antigen |
| Pt            | platinum                           |
| PTPmu         | protein tyrosine phosphatase mu    |
| PTX           | paclitaxel                         |
| PUFA          | polyunsaturated fatty acids        |
| PUFA-CoAs     | acyl-coenzyme A derivatives        |
| PVC           | polyvinyl chloride                 |
| R&D           | research and development           |
| ROS           | reactive oxygen species            |
| SA            | scutellaria barbadensis A          |
| SAC           | oligonucleotide conjugate          |
| SAS           | sulfasalazine                      |
| SCLC          | small cell carcinoma               |
| siGPX4        | small interfering RNA of GPX4      |

Table S1 (*continued*)

| Abbreviations | Full Forms                                        |
|---------------|---------------------------------------------------|
| SLC7A11       | solute transporter family 7A11                    |
| SRF           | sorafenib                                         |
| SS            | sodium selenite                                   |
| STAD          | stomach adenocarcinoma                            |
| STEAP3        | STEAP family member 3                             |
| SWOT          | strengths, weaknesses, opportunities, and threats |
| TA            | tannic acid                                       |
| Teff cells    | Effector T cells                                  |
| TfR1          | transferrin receptor 1                            |
| TGI           | tumor growth inhibition                           |
| TME           | tumor microenvironment                            |
| TNBC          | triple-negative breast cancer                     |
| TPP           | (4-carboxybutyl)triphenylphosphonium              |
| TSPO          | translocator protein                              |
| TXN           | thioredoxin                                       |
| UCNPs         | upconversion nanoparticles                        |
| ZnO           | zinc oxide                                        |

264

265

266

267

268

269

270

271

272

273

274

275

276

277

## 278 **References**

- 279 1. M. Weller, P. Y. Wen, S. M. Chang, L. Dirven, M. Lim, M. Monje and G.  
280 Reifengerger, Glioma, *Nature Reviews Disease Primers* 2024,**10**.
- 281 2. A. F. Tamimi and M. Juweid. Epidemiology and Outcome of Glioblastoma. In: S.  
282 De Vleeschouwer, editor. Glioblastoma. Brisbane (AU): Codon Publications  
283 Copyright: The Authors.; 2017.
- 284 3. Y. Luo, G. Tian, X. Fang, S. Bai, G. Yuan and Y. Pan, Ferroptosis and Its Potential  
285 Role in Glioma: From Molecular Mechanisms to Therapeutic Opportunities,  
286 *Antioxidants* 2022,**11**.
- 287 4. X. Wang, S. Lu, C. He, C. Wang, L. Wang, M. Piao, G. Chi, Y. Luo and P. Ge,  
288 RSL3 induced autophagic death in glioma cells via causing glycolysis dysfunction,  
289 *Biochem Biophys Res Commun* 2019,**518**,590.
- 290 5. L. F. Ye, K. R. Chaudhary, F. Zandkarimi, A. D. Harken, C. J. Kinslow, P. S.  
291 Upadhyayula, A. Dovas, D. M. Higgins, H. Tan, Y. Zhang, M. Buonanno, T. J. C.  
292 Wang, T. K. Hei, J. N. Bruce, P. D. Canoll, S. K. Cheng and B. R. Stockwell, Radiation-  
293 Induced Lipid Peroxidation Triggers Ferroptosis and Synergizes with Ferroptosis  
294 Inducers, *ACS Chem. Biol.* 2020,**15**,469.
- 295 6. B. Liu, Q. F. Ji, Y. Cheng, M. Liu, B. L. Zhang, Q. B. Mei, D. Z. Liu and S. Y.  
296 Zhou, Biomimetic GBM-targeted drug delivery system boosting ferroptosis for  
297 immunotherapy of orthotopic drug-resistant GBM, *Journal of Nanobiotechnology*  
298 2022,**20**.
- 299 7. A. Zhu, W. Tu, M. Ding, Y. Zhang, J. Liu, X. Chen, L. Wang, Y. Liu and J. Li, X-  
300 ray-activatable hitchhiking polymer nanodrugs enable controllable ferroptosis and  
301 immunization for orthotopic glioma rejection, *Chem. Eng. J.* 2024,**497**.
- 302 8. B. Li, X. Chen, W. Qiu, R. Zhao, J. Duan, S. Zhang, Z. Pan, S. Zhao, Q. Guo, Y.  
303 Qi, W. Wang, L. Deng, S. Ni, Y. Sang, H. Xue, H. Liu and G. Li, Synchronous  
304 Disintegration of Ferroptosis Defense Axis via Engineered Exosome-Conjugated  
305 Magnetic Nanoparticles for Glioblastoma Therapy, *Advanced Science* 2022,**9**.
- 306 9. Y. Li, B. Yan and S. He, Advances and challenges in the treatment of lung cancer,  
307 *Biomed. Pharmacother.* 2023,**169**.

10. L. Zeng, X. Liu, C. Geng, X. Gao and L. Liu, Ferroptosis in cancer (Review),  
*Oncol. Lett.* 2024,**28**.
11. J. Zhou, L. Zhang, J. Yan, A. Hou, W. Sui and M. Sun, Curcumin Induces  
Ferroptosis in A549 CD133<sup>+</sup> Cells through the GSH-GPX4 and FSP1-  
CoQ10-NAPH Pathways, *Discov. Med.* 2023,**35**,251.
12. S. Feng, Y. Li, H. Huang, H. Huang, Y. Duan, Z. Yuan, W. Zhu, Z. Mei, L. Luo  
and P. Yan, Isoorientin reverses lung cancer drug resistance by promoting ferroptosis  
via the SIRT6/Nrf2/GPX4 signaling pathway, *Eur J Pharmacol* 2023,**954**.
13. H.-X. Tian, J. Mei, L. Cao, J. Song, D. Rong, M. Fang, Z. Xu, J. Chen, J. Tang, H.  
Xiao, Z. Liu, P.-Y. Wang, J.-Y. Yin and X.-P. Li, Disruption of Iron Homeostasis to  
Induce Ferroptosis with Albumin-Encapsulated Pt(IV) Nanodrug for the Treatment of  
Non-Small Cell Lung Cancer, *Small* 2023,**19**.
14. F. Q. Fu, W. H. Wang, L. J. Wu, W. H. Wang, Z. W. Huang, Y. Huang, C. B. Wu  
and X. Pan, Inhalable Biomineralized Liposomes for Cyclic Ca<sup>2+</sup>-Burst-Centered  
Endoplasmic Reticulum Stress Enhanced Lung Cancer Ferroptosis Therapy, *Acs Nano*  
2023,**17**,5486.
15. M. L. Wilson, K. A. Fleming, M. A. Kuti, L. M. Looi, N. Lago and K. Ru,  
Pathology and laboratory medicine in low-income and middle-income countries 1:  
Access to pathology and laboratory medicine services: a crucial gap, *Lancet*  
2018,**391**,1927.
16. M. J. Hangauer, V. S. Viswanathan, M. J. Ryan, D. Bole, J. K. Eaton, A. Matov, J.  
Galeas, H. D. Dhruv, M. E. Berens, S. L. Schreiber, F. McCormick and M. T.  
McManus, Drug-tolerant persister cancer cells are vulnerable to GPX4 inhibition,  
*Nature* 2017,**551**,247.
17. W. S. Yang, R. SriRamaratnam, M. E. Welsch, K. Shimada, R. Skouta, V. S.  
Viswanathan, J. H. Cheah, P. A. Clemons, A. F. Shamji, C. B. Clish, L. M. Brown, A.  
W. Girotti, V. W. Cornish, S. L. Schreiber and B. R. Stockwell, Regulation of  
Ferroptotic Cancer Cell Death by GPX4, *Cell* 2014,**156**,317.
18. H. Yu, C. Yang, L. Jian, S. Guo, R. Chen, K. Li, F. Qu, K. Tao, Y. Fu, F. Luo and  
S. Liu, Sulfasalazine-induced ferroptosis in breast cancer cells is reduced by the

inhibitory effect of estrogen receptor on the transferrin receptor, *Oncol. Rep.* 2019,**42**,826.

19. Y. Liang, C. Peng, N. Su, Q. Y. Li, S. W. Chen, D. Wu, B. Wu, Y. Gao, Z. T. Xu, Q. Dan, S. Zheng, B. X. Zhao and Y. J. Li, Tumor microenvironments self-activated cascade catalytic nanoscale metal organic frameworks as ferroptosis inducer for radiosensitization, *Chem. Eng. J.* 2022,**437**.

20. J. Wu, X. Zhang, D. Sun, X. Shi, J. Sun, C. Luo, Z. He and S. Zhang, Molecularly engineering a lipid nanoregulator destroying the last defense of ferroptosis in breast cancer therapy, *Chem. Eng. J.* 2024,**495**.

21. M. Domagala-Haduch, A. Gorzelak-Magiera, L. Michalecki and I. Gisterek-Grocholska, Radiochemotherapy in Pancreatic Cancer, *Current Oncology* 2024,**31**,3291.

22. A. Suda, B. A. Umaru, Y. Yamamoto, H. Shima, Y. Saiki, Y. Pan, L. Jin, J. Sun, Y. L. C. Low, C. Suzuki, T. Abe, K. Igarashi, T. Furukawa, Y. Owada and Y. Kagawa, Polyunsaturated fatty acids-induced ferroptosis suppresses pancreatic cancer growth, *Sci. Rep.* 2024,**14**.

23. N. Eling, L. Reuter, J. Hazin, A. Hamacher-Brady and N. R. Brady, Identification of artesunate as a specific activator of ferroptosis in pancreatic cancer cells, *Oncoscience* 2015,**2**,517.

24. A. Huang, Q. Li, X. Shi, J. Gao, Y. Ma, J. Ding, S. Hua and W. Zhou, An iron-containing nanomedicine for inducing deep tumor penetration and synergistic ferroptosis in enhanced pancreatic cancer therapy, *Materials Today Bio* 2024,**27**.

25. X. Yu, H. Pan, Q. He, J. Yang, M. Xiao, J. Xu, W. Wang, X. Yu and S. Shi, MXene-based dual-gated multifunctional nanodrug induced ferroptosis and modulated tumor microenvironment to treat pancreatic cancer, *Chem. Eng. J.* 2024,**500**.

26. C. Qiao, H. Wang, Q. Guan, M. Wei and Z. Li, Ferroptosis-based nano delivery systems targeted therapy for colorectal cancer: Insights and future perspectives, *Asian Journal of Pharmaceutical Sciences* 2022,**17**,613.

27. S. Lin, Y. Li, A. A. Zamyatnin, Jr., J. Werner and A. V. Bazhin, Reactive oxygen species and colorectal cancer, *J Cell Physiol* 2018,**233**,5119.

28. Y. Y. Qiao, M. Su, H. F. Zhao, H. L. Liu, C. X. Wang, X. T. Dai, L. L. Liu, G. J. Liu, H. R. Sun, M. M. Sun, J. Y. Wang, Z. Li, J. Fan, Q. Zhang, C. S. Li, F. M. Situ, J. Xue, Z. H. Jia, C. Z. Zhang, S. Zhang and C. L. Shan, Targeting FTO induces colorectal cancer ferroptotic cell death by decreasing SLC7A11/GPX4 expression, *J. Exp. Clin. Cancer Res.* 2024,**43**.
29. K. Deng, H. Tian, T. Zhang, Y. Gao, E. C. Nice, C. Huang, N. Xie, G. Ye and Y. Zhou, Chemo-photothermal nanoplatform with diselenide as the key for ferroptosis in colorectal cancer, *J. Controlled Release* 2024,**366**,684.
30. X. Pan, Y. Qi, Z. Du, J. He, S. Yao, W. Lu, K. Ding and M. Zhou, Zinc oxide nanosphere for hydrogen sulfide scavenging and ferroptosis of colorectal cancer, *Journal of Nanobiotechnology* 2021,**19**.
31. K. Khorsandi, H. Esfahani, S. Keyvani-Ghamsari and P. Lakhshehei, Targeting ferroptosis in melanoma: cancer therapeutics, *Cell Communication and Signaling* 2023,**21**.
32. Y. Wang, Y. Ma and K. Jiang, The role of ferroptosis in prostate cancer: a novel therapeutic strategy, *Prostate Cancer Prostatic Dis.* 2023,**26**,25.
33. Y. Wang, M. Hu, J. Cao, F. Wang, J. R. Han, T. W. Wu, L. Li, J. Yu, Y. Fan, G. Xie, H. Lian, Y. Cao, N. Naowarojna, X. Wang and Y. Zou, ACSL4 and polyunsaturated lipids support metastatic extravasation and colonization, *Cell* 2024.
34. W. Wang, Z. Zhong, S. Peng, J. Fu, M. Chen, T. Lang, X. Yue, Y. Fu, J. He, Y. Jin, Y. Huang, C. Wu, Z. Huang and X. Pan, "All-in-one" metal polyphenol network nanocapsules integrated microneedle patches for lipophagy fueled ferroptosis-mediated multimodal therapy, *J. Controlled Release* 2024,**373**,599.
35. H. Wang, L. Zhang, Z. Miao, M. Zhang, H. Liu, Q. He, J. Meng, L. Wen, Z. Ke, Z. Zha, R. Lin and C. Liang, PSMA-targeted arsenic nanosheets: a platform for prostate cancer therapy *via* ferroptosis and ATM deficiency-triggered chemosensitization, *Materials Horizons* 2021,**8**,2216.
36. W. Wang, J. Cai, J. Wen, X. Li, Y. Yu, L. Zhang, Q. Han, Z. Wei, Y. Ma, F. Ying, X. Xu, W. Li, Q. Yang, S. Sun, X. He, L. Cai, H. Xiao and Z. Wang, Boosting ferroptosis *via* abplatin<sup>(iv)</sup> for treatment of platinum-resistant

398 recurrent ovarian cancer, *Nano Today* 2022,**44**.

399 37. F. Bray, M. Laversanne, H. Sung, J. Ferlay, R. L. Siegel, I. Soerjomataram and A.  
400 Jemal, Global cancer statistics 2022: GLOBOCAN estimates of incidence and mortality  
401 worldwide for 36 cancers in 185 countries, *Ca-a Cancer Journal for Clinicians*  
402 2024,**74**,229.

403
